# Supplementary material for: Synthesis of late transition-metal nanoparticles by Na naphthalenide reduction of salts and their catalytic efficiency
Source: Royal Society of Chemistry journal article supplement (doi:10.1039/c7qi00530j), 2017-01-01
Supplement: c7qi00530j1.pdf [file c7qi00530j1.pdf]

## ELECTRONIC SUPPORTING INFORMATION (ESI)

### Synthesis of Late Transition-Metal Nanoparticles by Na Naphthalenide Reduction of Salts and Their Catalytic Efficiency

Fangyu Fu,<sup>a</sup> Angel Martinez,<sup>b</sup> Ane Escobar,<sup>b</sup> Joseba Irigoyen,<sup>b</sup> Sergio Moya,<sup>b</sup> Eric Fouquet,<sup>a</sup> Jaime Ruiz,<sup>a</sup>  
Didier Astruc<sup>a\*</sup>

<sup>a</sup> ISM, UMR CNRS N° 5255, Univ. Bordeaux, 33405 Talence Cedex, France.

<sup>b</sup> Soft Matter Nanotechnology Lab, CIC biomaGUNE, Paseo Miramón 182. 20014. Donostia-San Sebastián,  
Gipuzkoa, Spain.

\*Corresponding Author: didier.astruc@u-bordeaux.fr

#### Table of contents

|                                                                                                                                |     |
|--------------------------------------------------------------------------------------------------------------------------------|-----|
| 1. UV-vis. spectrum of naphthalene.....                                                                                        | S2  |
| 2. UV-vis. spectrum of pure PdPEG nanoparticles.....                                                                           | S2  |
| 3. UV-vis. spectrum of pure CuPEG nanoparticles.....                                                                           | S3  |
| 4. X-ray photoelectron spectroscopy (XPS) of pure PdPEG nanoparticles.....                                                     | S3  |
| 5. Size distribution of MPEG.....                                                                                              | S4  |
| 6. TEM of MPEG-1 of MPEG-1.....                                                                                                | S4  |
| 7. UV-vis. spectrum of the 4-NP reduction and reaction rate ( $k_{app}$ ).....                                                 | S5  |
| 8. <sup>1</sup> H, <sup>13</sup> C NMR, ESI-MS, and CV of <i>p</i> -bis(cobalticinium-1,2,3-triazolylmethyl)<br>benzene, ..... | S13 |
| 9. <sup>1</sup> H NMR spectrum of 3.....                                                                                       | S15 |
| 10. Size distribution of PdPEG@SBA-15.....                                                                                     | S16 |
| 11. Recycling results of Suzuki-Miyaura reactions.....                                                                         | S16 |
| 12. TEM image and histogram of PdPEG@SBA-15 after recycling.....                                                               | S16 |
| 13. <sup>1</sup> H NMR spectrum of Diphenylacetylene.....                                                                      | S17 |
| 14. Recycling results of Sonogashira reactions.....                                                                            | S17 |

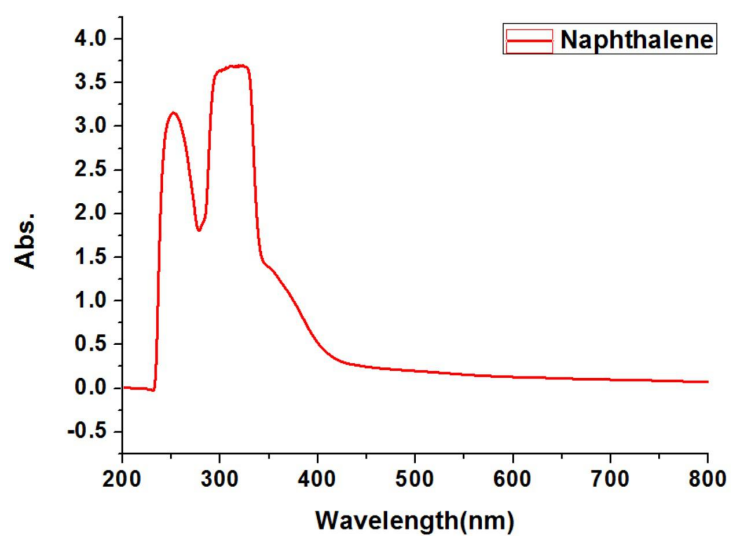

Figure S1. UV-vis. spectrum of naphthalene.

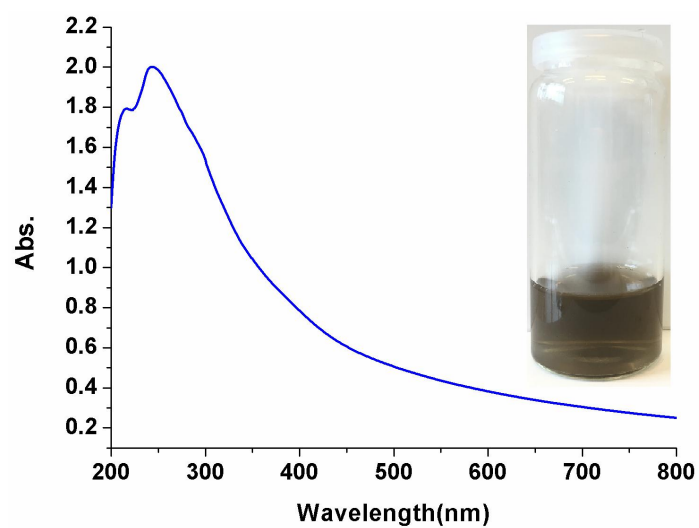

Figure S2. UV-vis. spectrum of pure PdPEG nanoparticles.

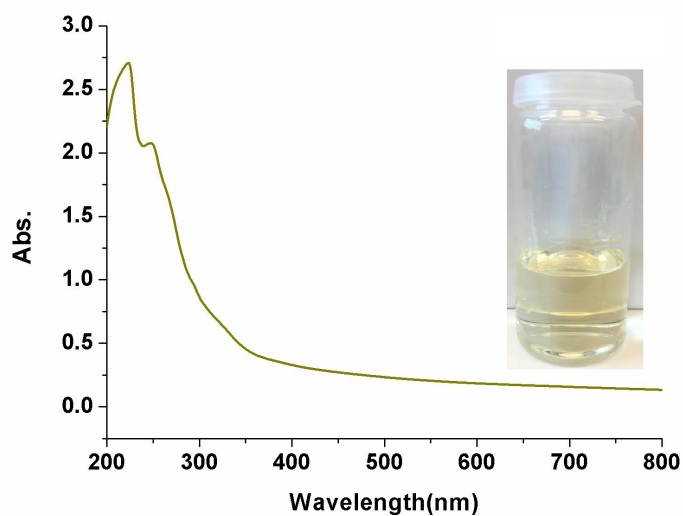

Figure S3. UV-vis. spectrum of pure CuPEG nanoparticles.

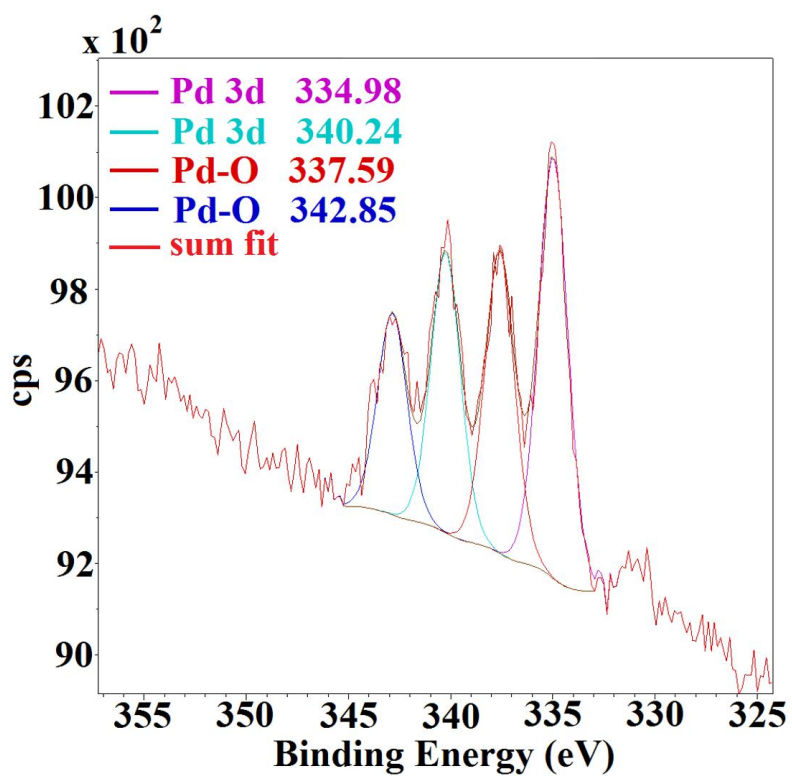

Figure S4. X-ray photoelectron spectroscopy (XPS) of pure PdPEG nanoparticles.

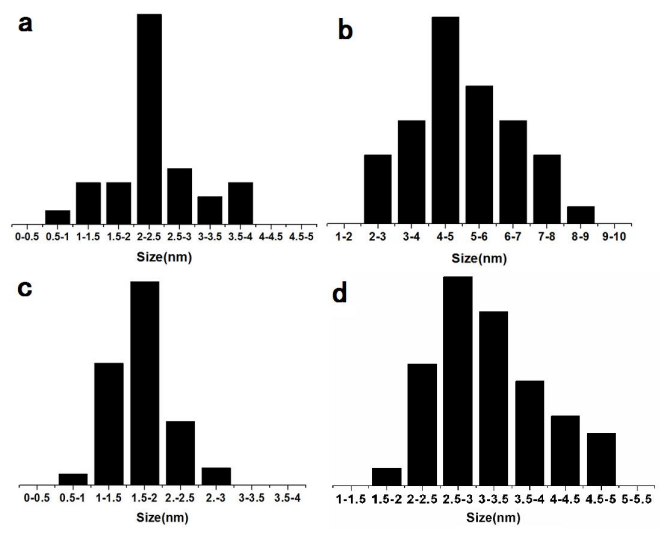

Figure S5. Size distribution of MPEG: a: AuPEG; b: AgPEG; c: PdPEG; d: CuPEG.

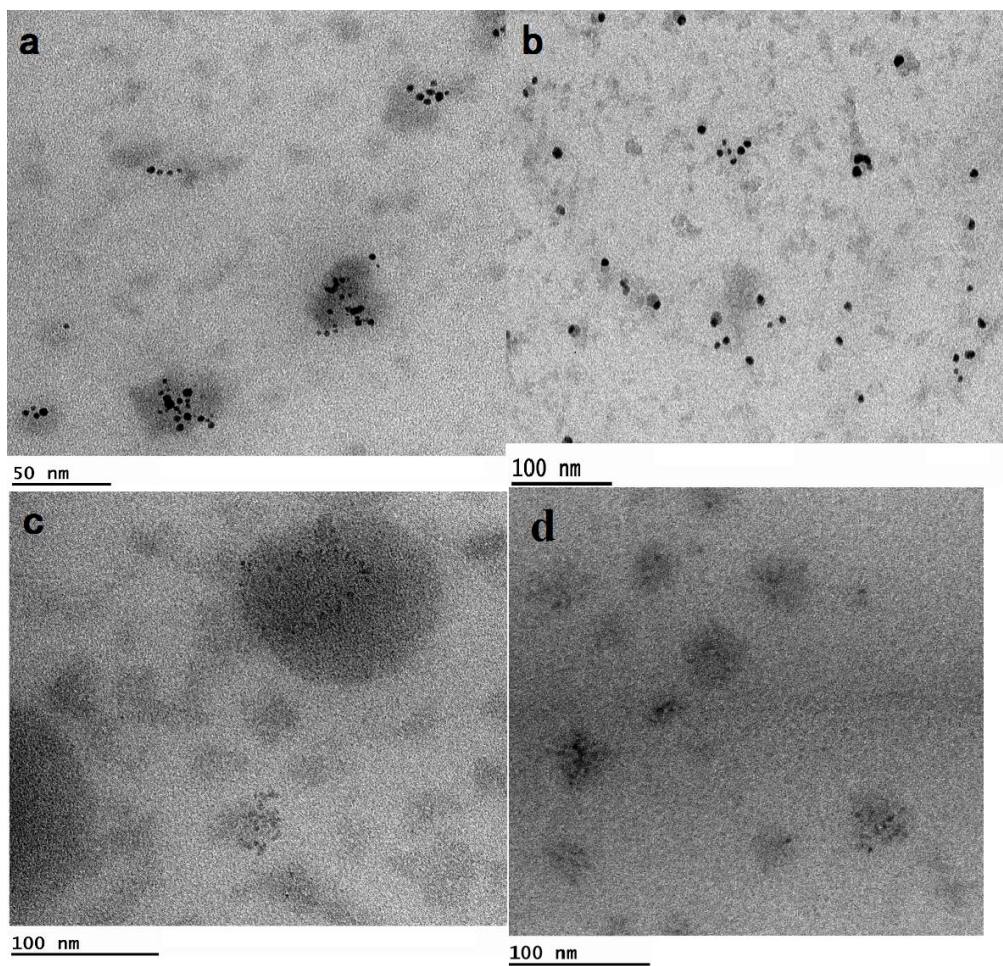

Figure S6. TEM of MPEG-1 (without purification): a: AuPEG-1; b: AgPEG-1; c: PdPEG-1; d: CuPEG-1.

UV-vis. spectrum of the 4-NP reduction and reaction rate ( $k_{app}$ )

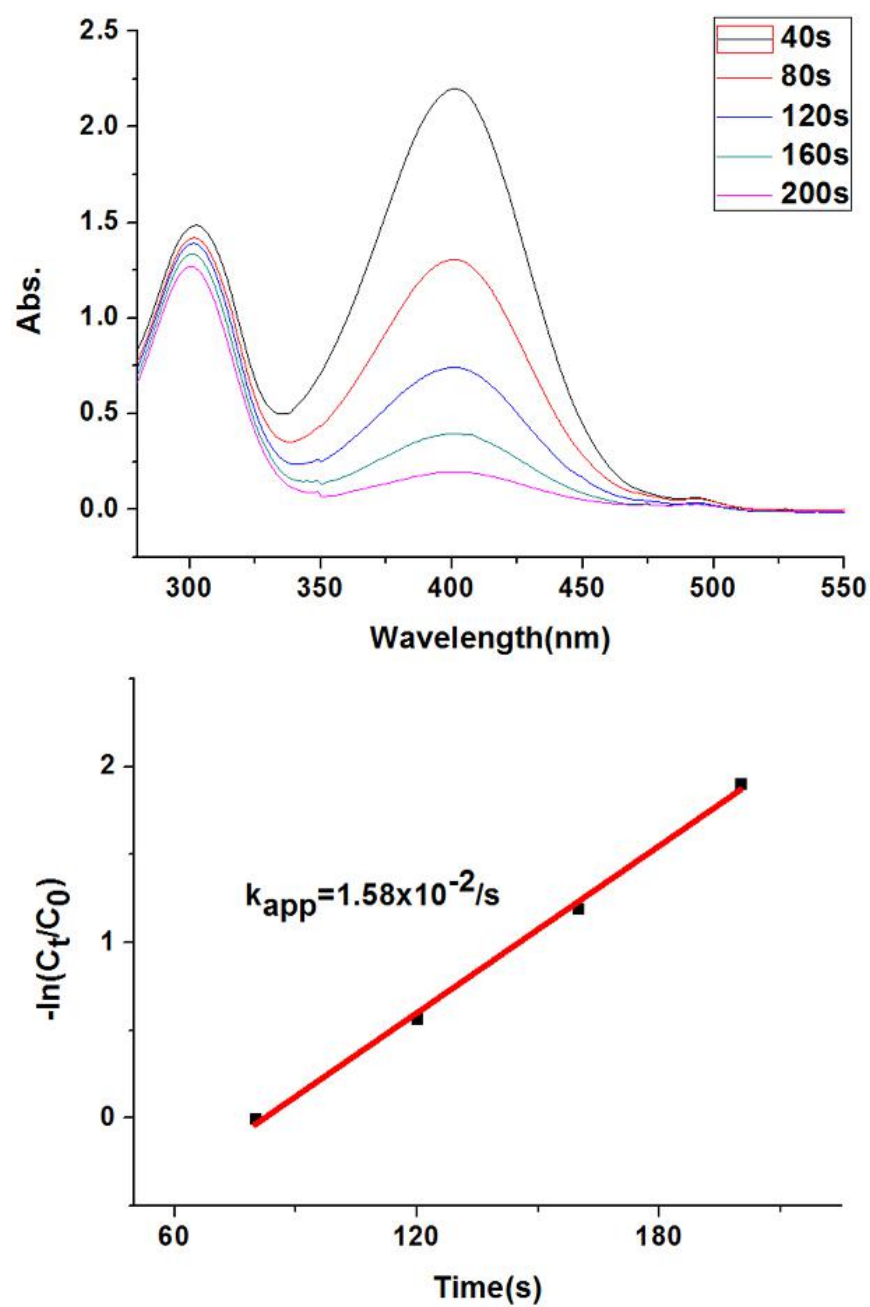

Figure S7. UV-vis. spectrum of the 4-NP reduction by  $\text{NaBH}_4$  catalyzed by AuPEG (top); consumption rate of 4-NP:  $-\ln(C_t/C_0)$  vs reaction time (bottom,  $R^2 = 0.9963$ ).

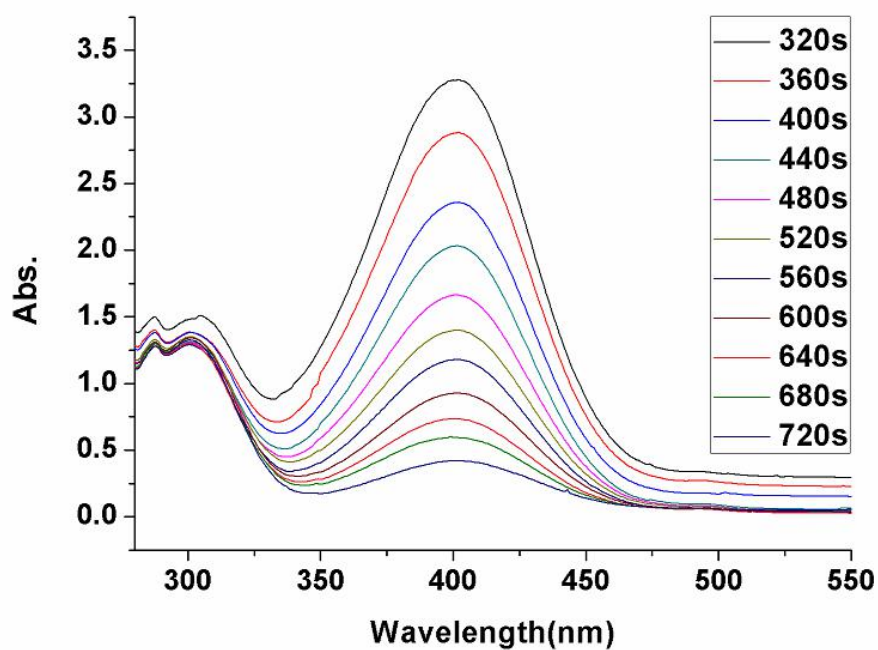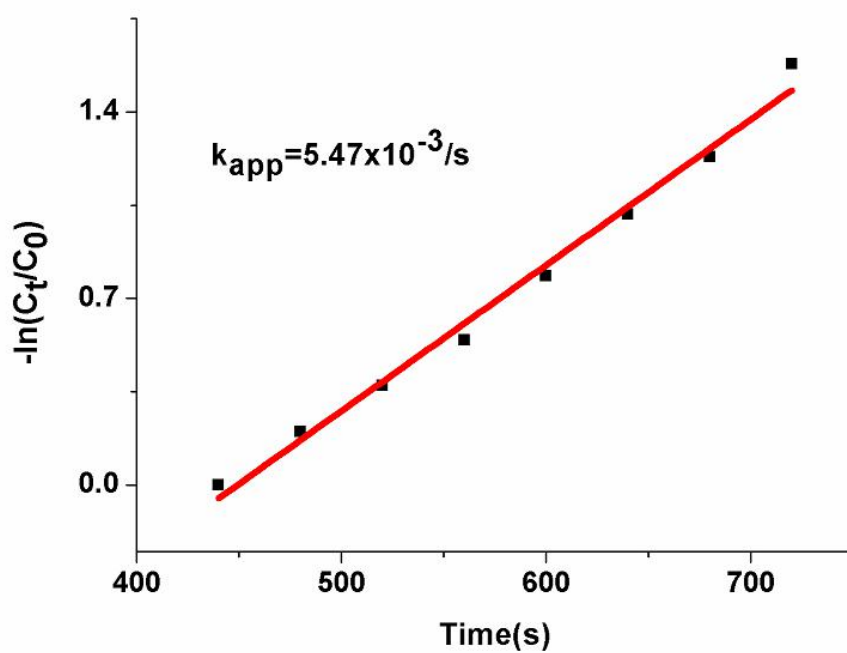

Figure S8. UV-vis. spectrum of the 4-NP reduction by  $\text{NaBH}_4$  catalyzed by AuPEG-1 (top); consumption rate of 4-NP:  $-\ln(C_t/C_0)$  vs reaction time (bottom,  $R^2 = 0.9883$ ).



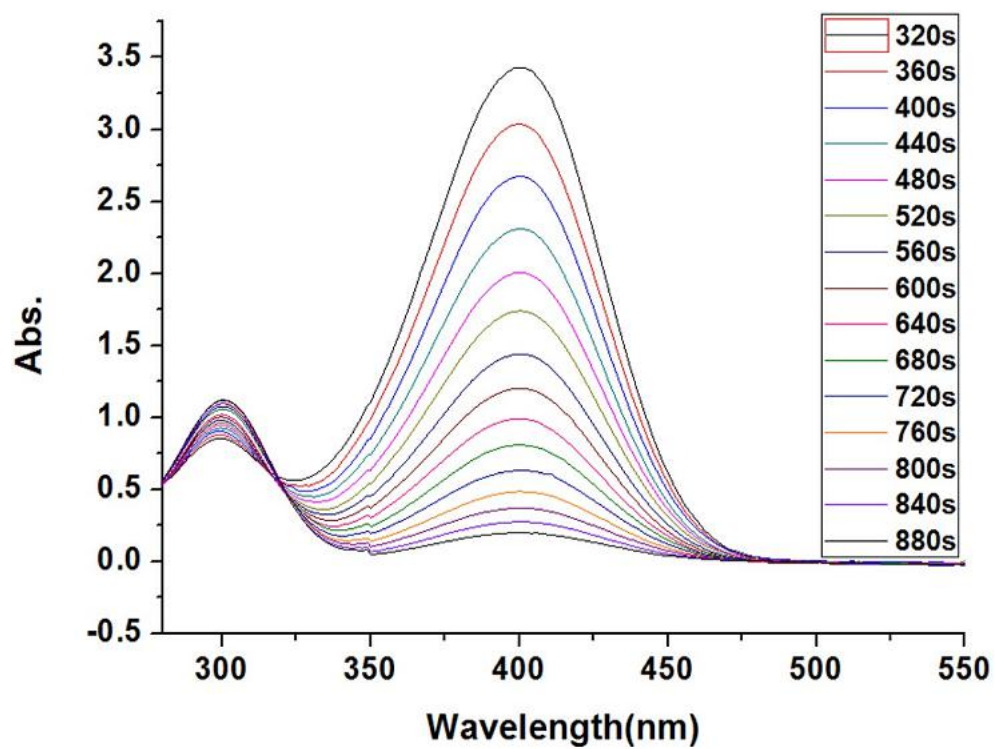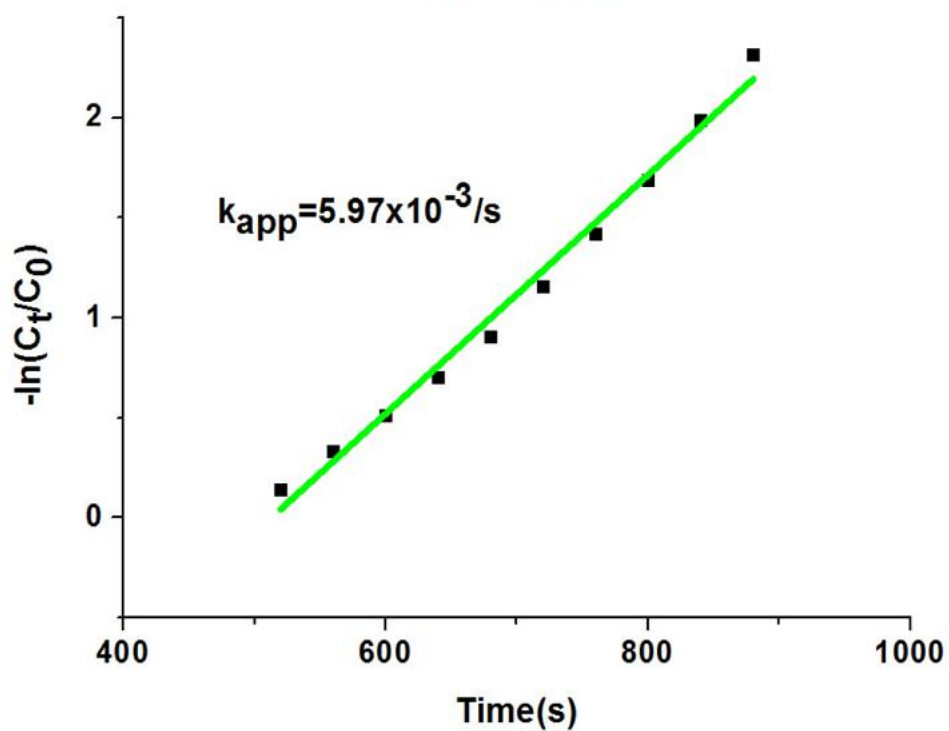

Figure S9. UV-vis. spectrum of the 4-NP reduction by NaBH<sub>4</sub> catalyzed by AgPEG (top); consumption rate of 4-NP:  $-\ln(C_t/C_0)$  vs reaction time (bottom,  $R^2 = 0.9882$ ).

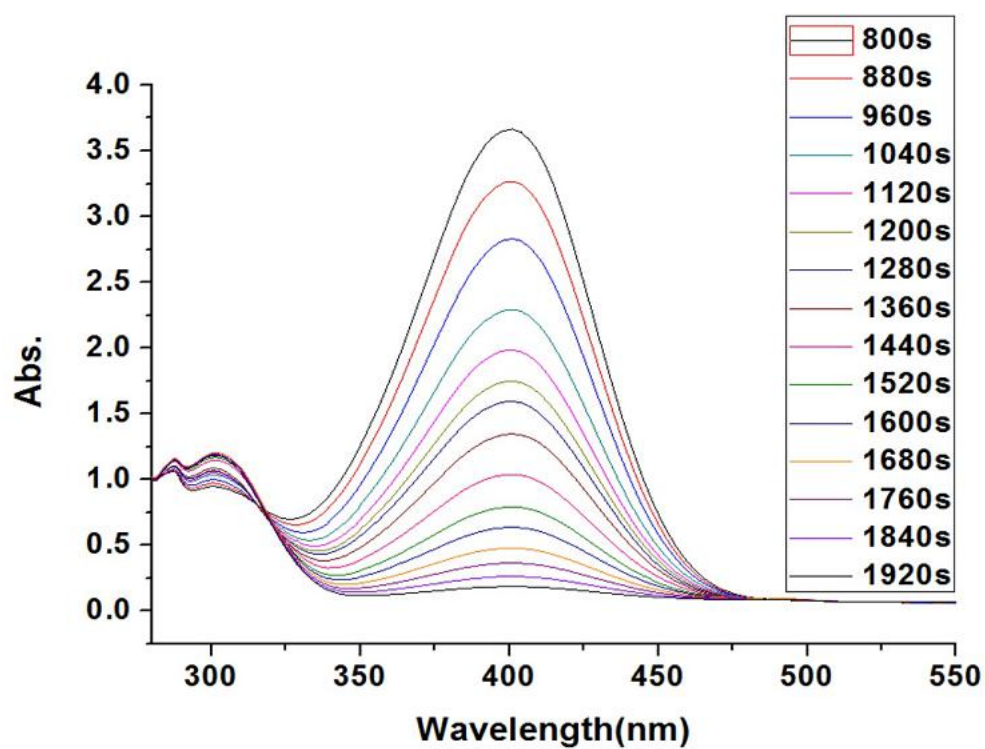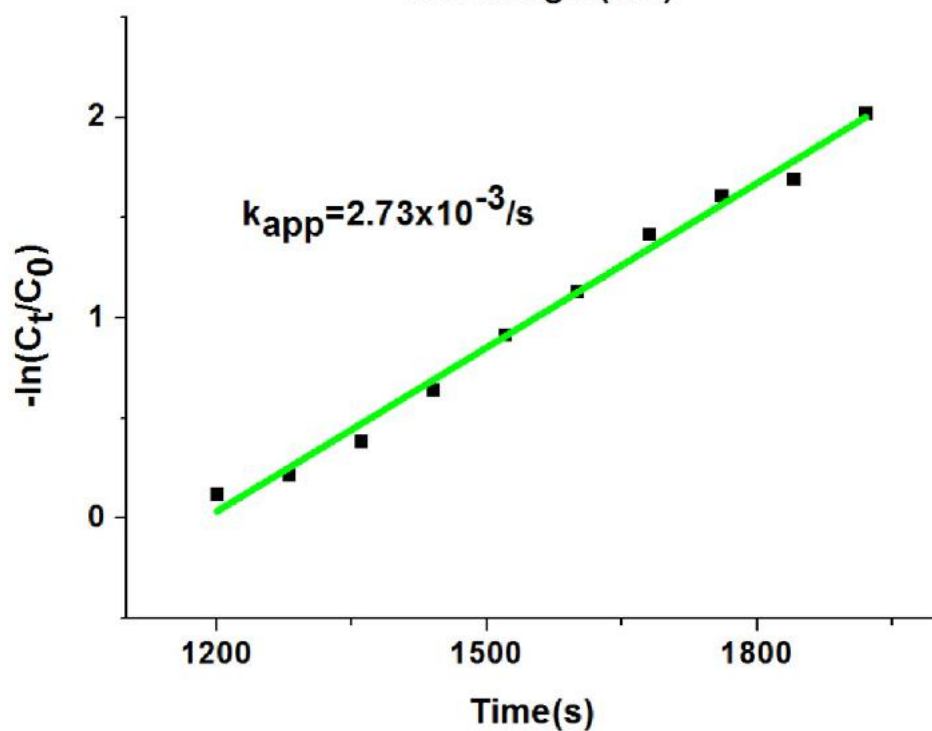

Figure S10. UV-vis. spectrum of the 4-NP reduction by  $\text{NaBH}_4$  catalyzed by AgPEG-1 (top); consumption rate of 4-NP:  $-\ln(C_t/C_0)$  vs reaction time (bottom,  $R^2 = 0.9901$ ).



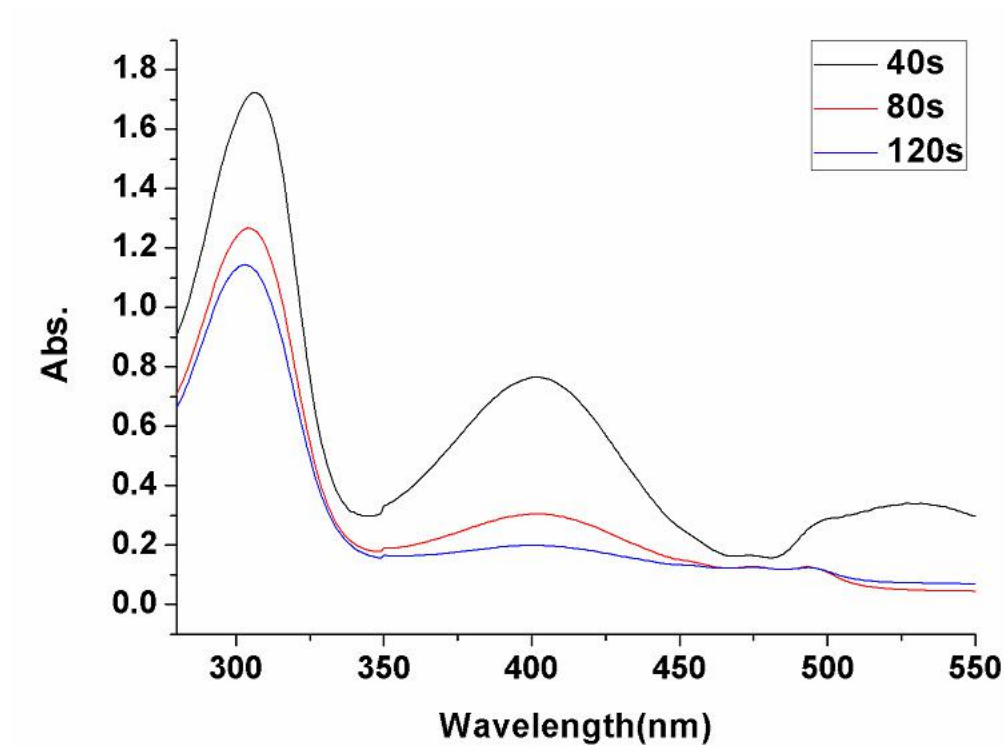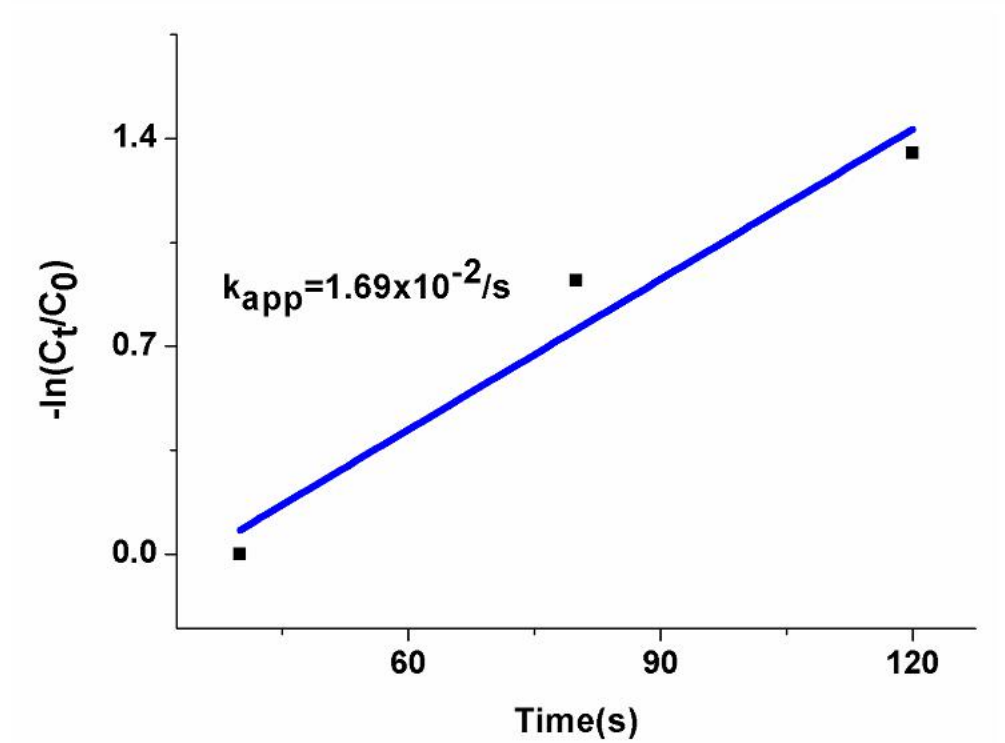

Figure S11. UV-vis. spectrum of the 4-NP reduction by NaBH<sub>4</sub> catalyzed by PdPEG (top); consumption rate of 4-NP:  $-\ln(C_t/C_0)$  vs reaction time (bottom,  $R^2 = 0.9157$ ).

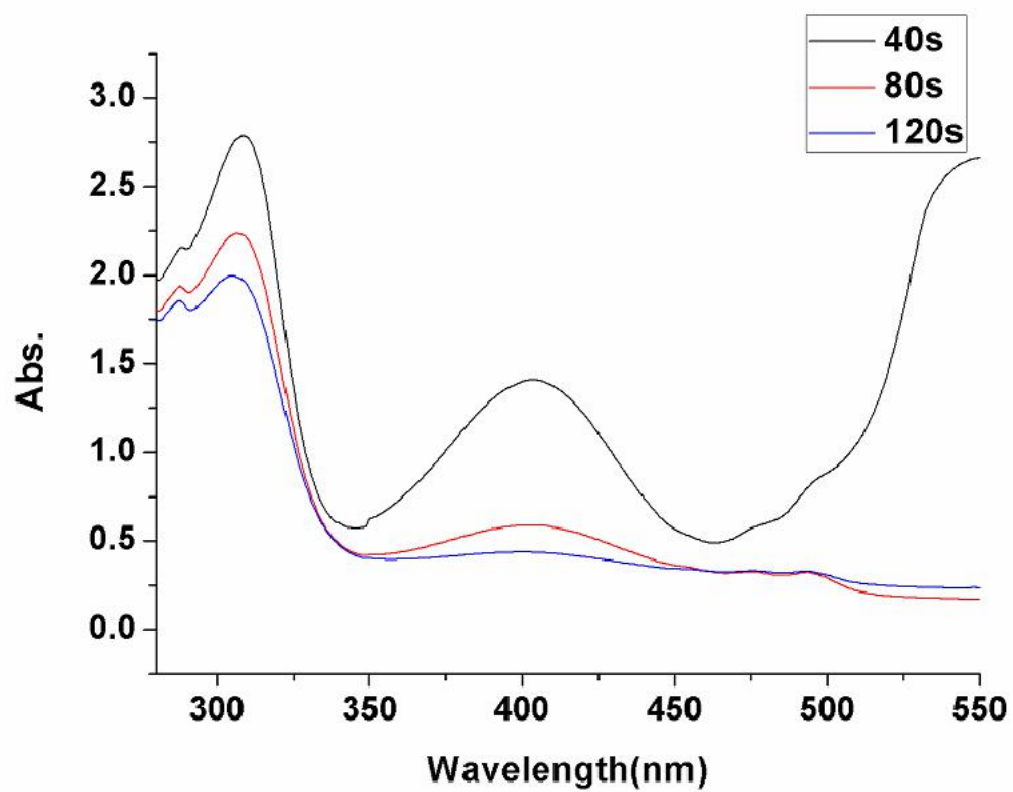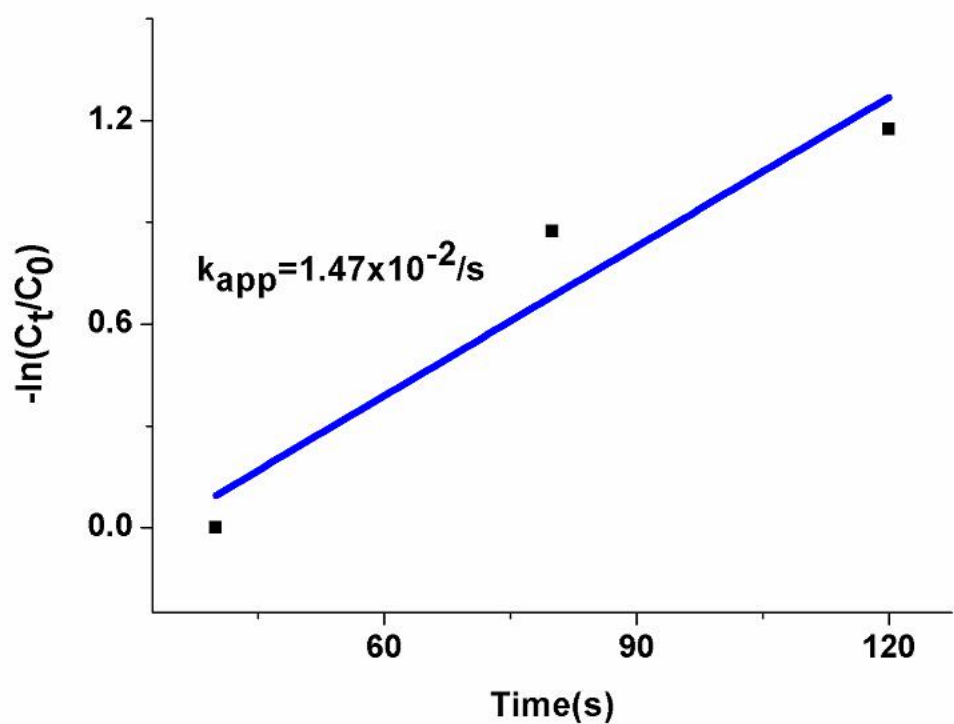

Figure S12. UV-vis. spectrum of the 4-NP reduction by NaBH<sub>4</sub> catalyzed by PdPEG-1 (top); consumption rate of 4-NP:  $-\ln(C_t/C_0)$  vs reaction time (bottom,  $R^2 = 0.8538$ )

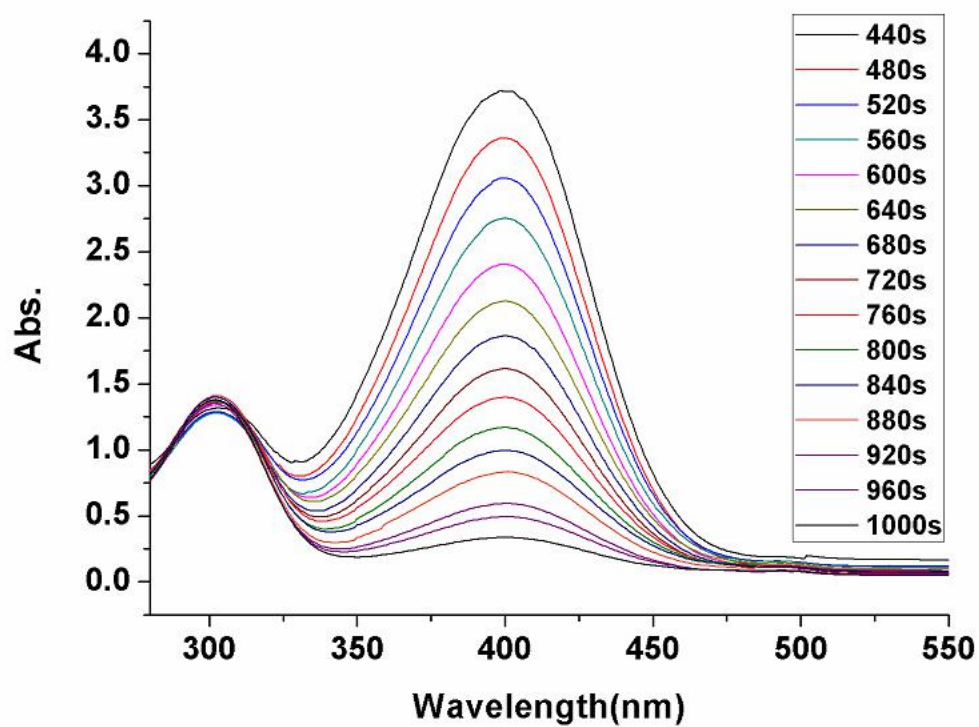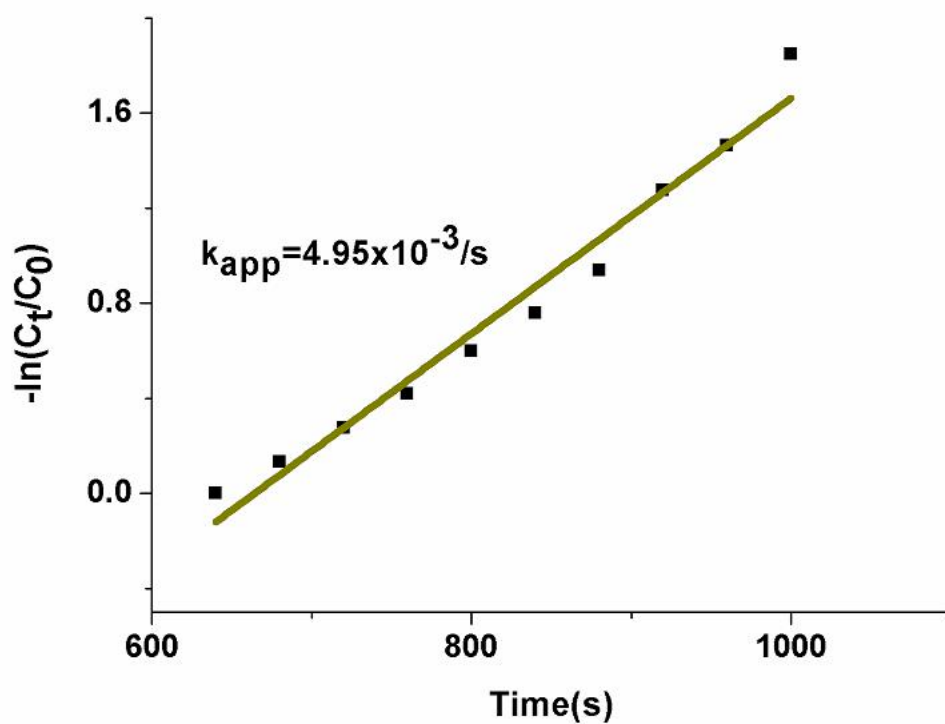

Figure S13. UV-vis. spectrum of the 4-NP reduction by NaBH<sub>4</sub> catalyzed by CuPEG (top); consumption rate of 4-NP:  $-\ln(C_t/C_0)$  vs reaction time (bottom,  $R^2 = 0.9698$ ).

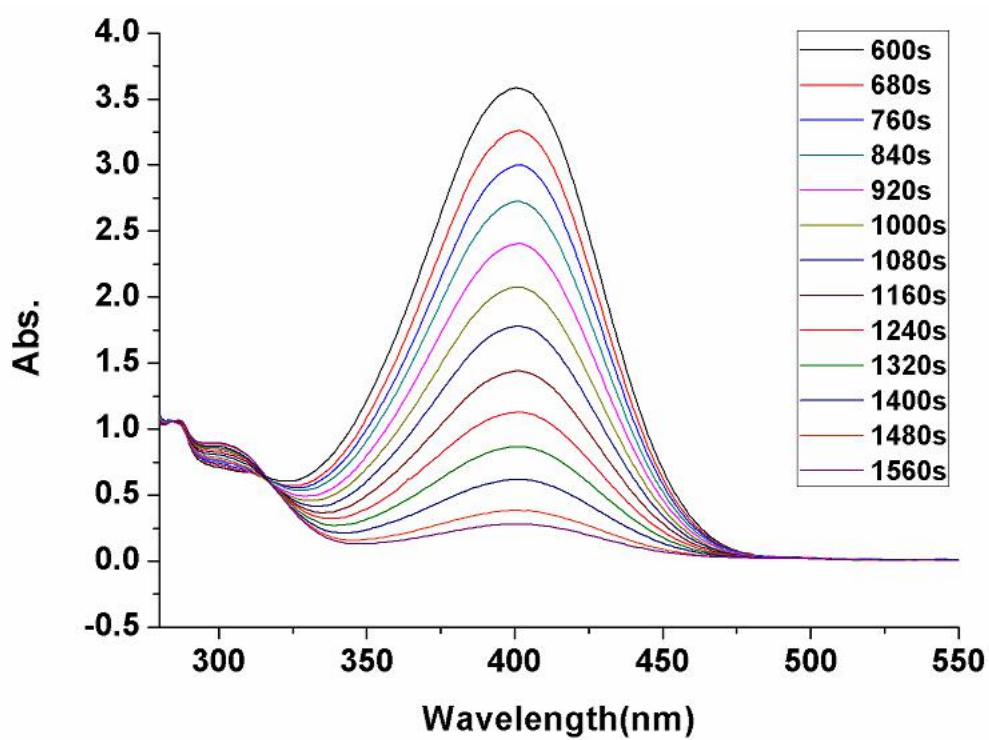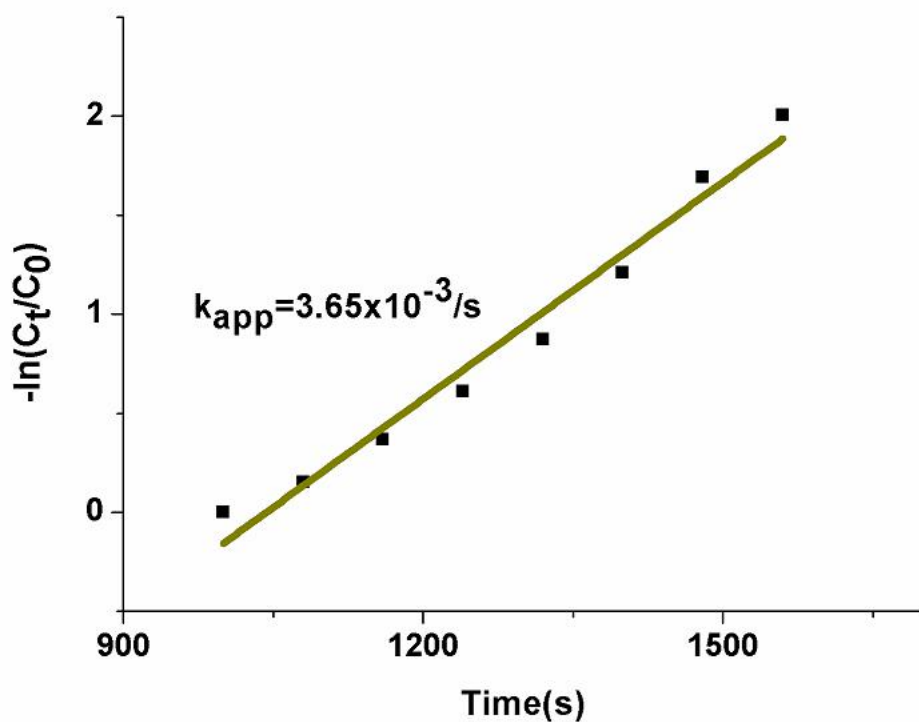

Figure S14. UV-vis. spectrum of the 4-NP reduction by  $\text{NaBH}_4$  catalyzed by CuPEG-1 (top); consumption rate of 4-NP:  $-\ln(C_t/C_0)$  vs reaction time (bottom,  $R^2 = 0.9711$ ).

$^1\text{H}$ ,  $^{13}\text{C}$  NMR, ESI-MS and CV of *p*-bis (cobalticinium-1,2,3-triazolylmethyl) benzene.

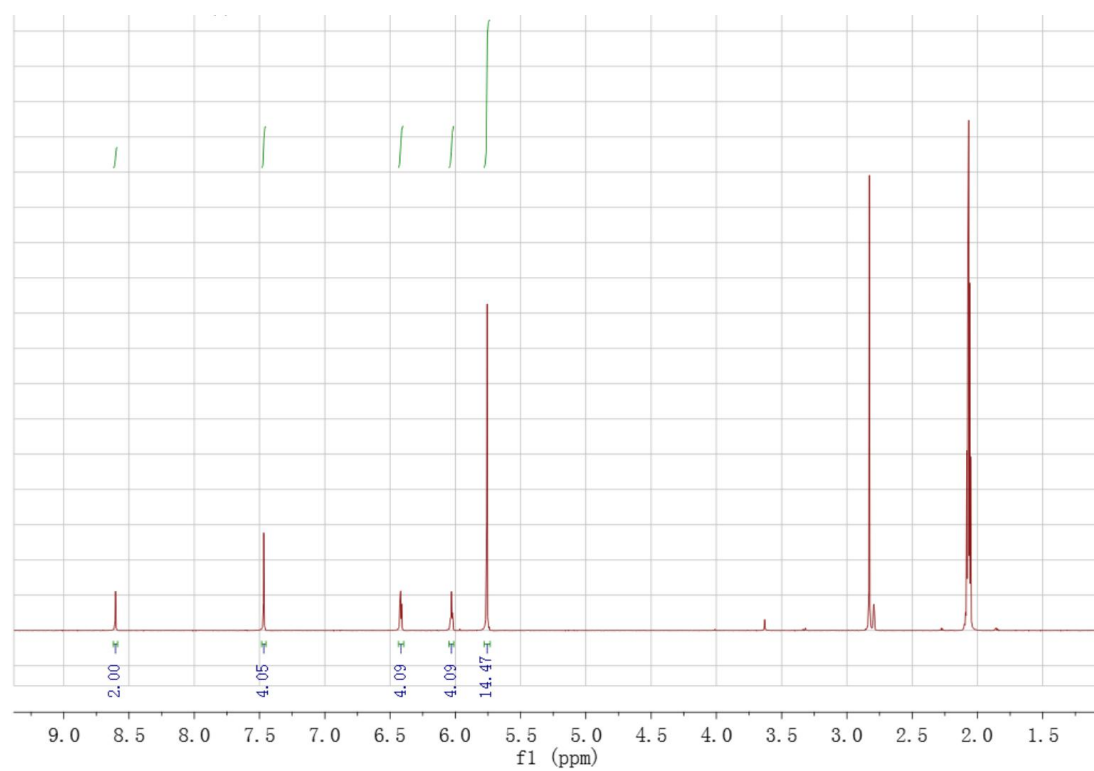

Figure S15.  $^1\text{H}$  NMR spectrum of *p*-bis (cobalticinium-1,2,3-triazolylmethyl) benzene.  $^1\text{H}$  NMR (300 MHz, Acetone)  $\delta$  8.60 (s, 2H), 7.47 (s, 4H), 6.44 – 6.40 (m, 4H), 6.05 – 6.01 (m, 4H), 5.76 (s, 14H).

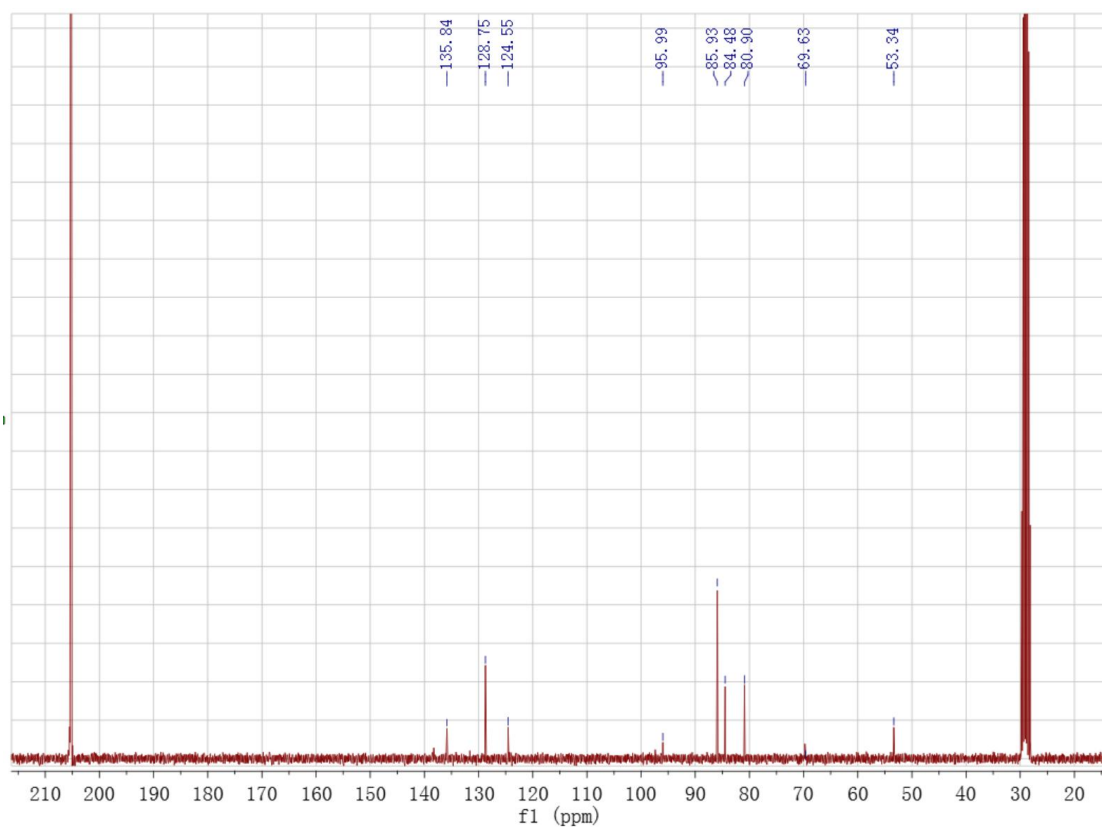

Figure S16.  $^{13}\text{C}$  NMR spectrum of *p*-bis (cobalticinium-1,2,3-triazolylmethyl) benzene.  $^{13}\text{C}$  NMR (76 MHz, Acetone)  $\delta$  135.84 (s), 128.75 (s), 124.55 (s), 95.99 (s), 85.93 (s), 84.48 (s), 80.90 (s), 69.76 – 69.50 (m), 53.34 (s).

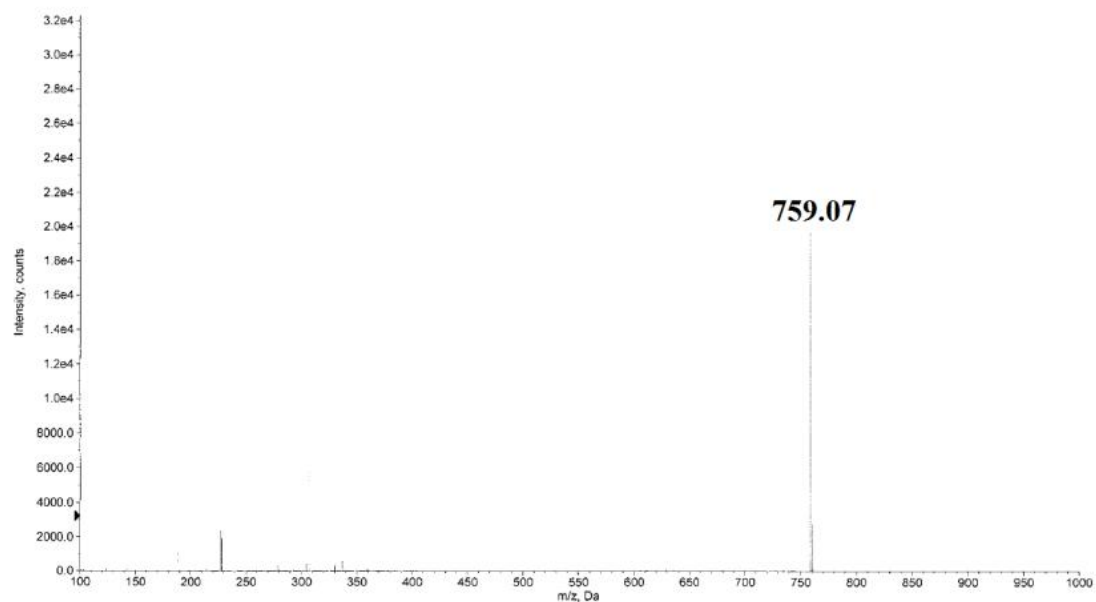

Figure S17. ESI-MS of *p*-bis (cobalticinium-1,2,3-triazolylmethyl) benzene. (759.07 Da = *p*-bis (cobalticinium-1,2,3-triazolylmethyl) benzene –  $\text{PF}_6^-$ )



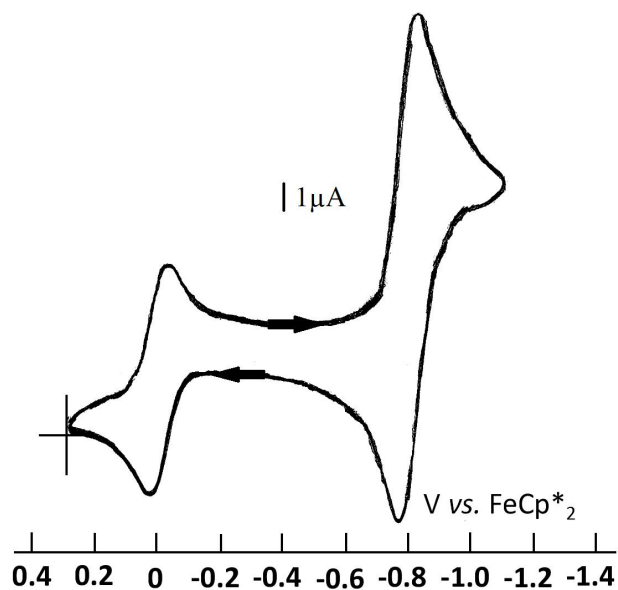

Figure S18. CV of decamethylferrocene reference and the first wave of *p*-bis(cobalticinium-1,2,3-triazolylmethyl) benzene. Internal reference: FeCp\*<sub>2</sub>; Solvent: DMF; 298 K; reference electrode: Ag; working and counter electrodes: Pt; scan rate: 0.2 V/s<sup>-1</sup>; supporting electrolyte: [*n*-Bu<sub>4</sub>N][PF<sub>6</sub>] (1 M).

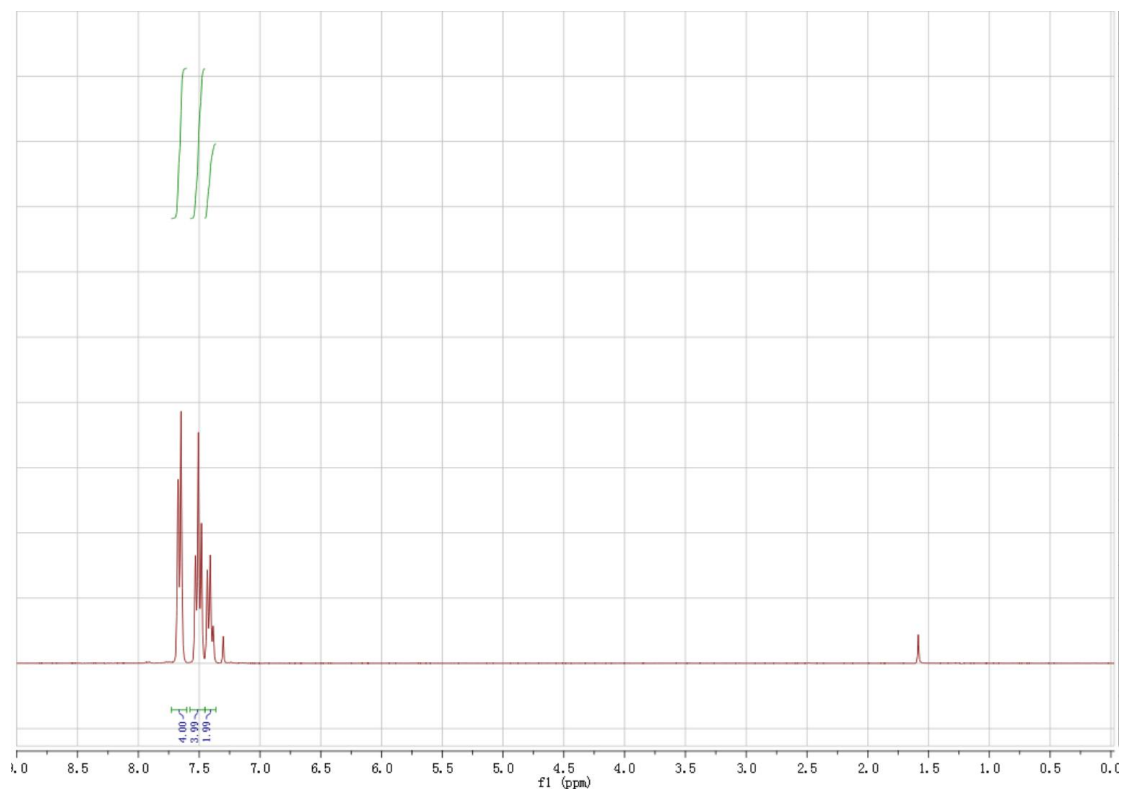

Figure S19. <sup>1</sup>H NMR spectrum of Biphenyl.

<sup>1</sup>H NMR (300 MHz, CDCl<sub>3</sub>) δ 7.66 (d, *J* = 7.3 Hz, 4H), 7.57 – 7.45 (m, 4H), 7.41 (t, *J* = 7.3 Hz, 2H).

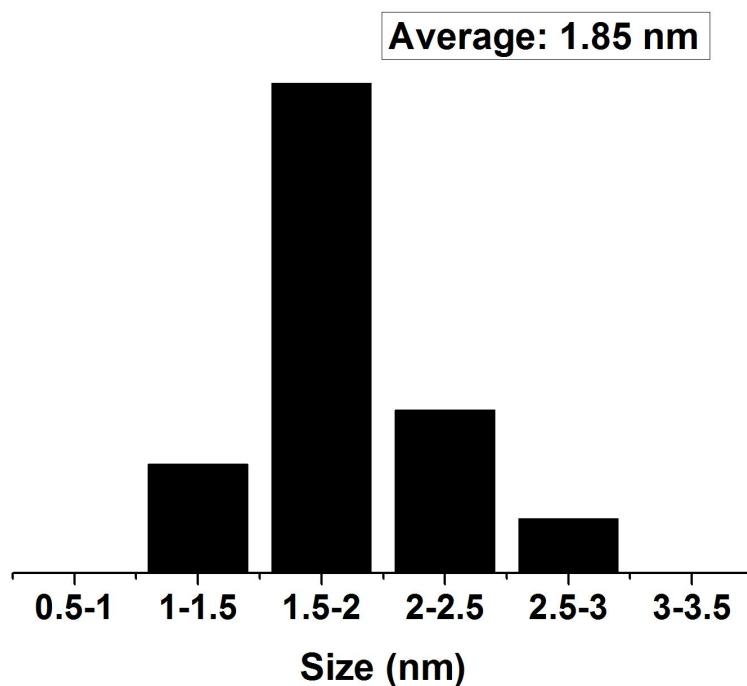

Figure S20. Size distribution of PdPEG@SBA-15.

Table S1. Recycling results of Suzuki reactions between phenylboronic acid and bromobenzene using 300 ppm of PdPEG@SBA-15 (ICP content:0.13%).

| Catalytic runs | 1 <sup>st</sup> | 2 <sup>nd</sup> | 3 <sup>rd</sup> | 4 <sup>th</sup> |
|----------------|-----------------|-----------------|-----------------|-----------------|
| Yield (%)      | 96              | 85              | 80              | 65              |

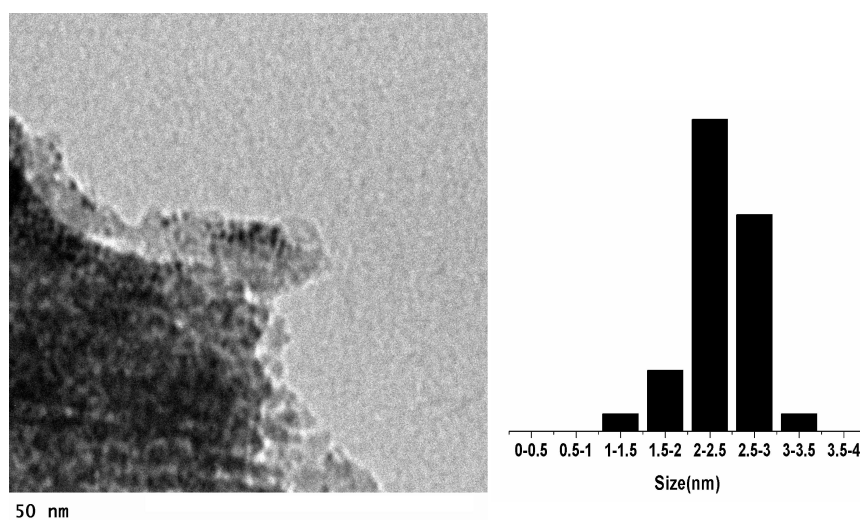

Figure S21. TEM image (left) and histogram (right) of PdPEG@SBA-15 after recycling.

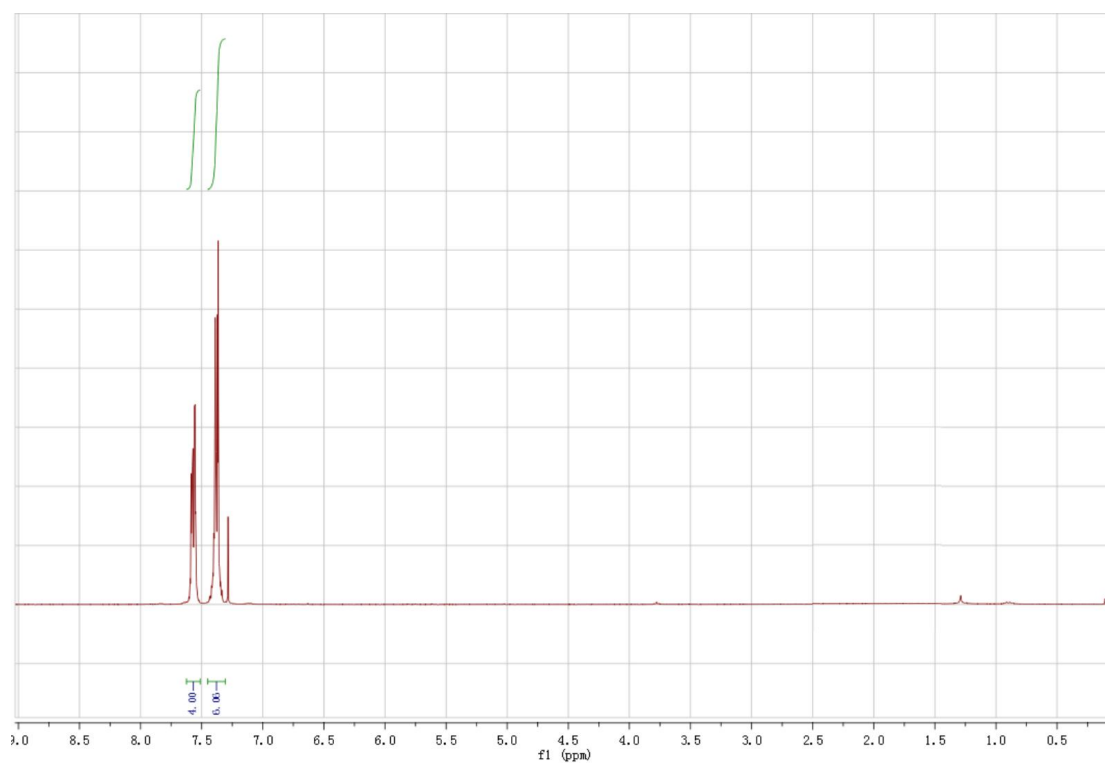

Figure S22.  $^1\text{H}$  NMR spectrum of Diphenylacetylene.

$^1\text{H}$  NMR (300 MHz,  $\text{CDCl}_3$ )  $\delta$  7.62 – 7.51 (m, 4H), 7.45 – 7.31 (m, 6H).

Table S2. Recycling results of Sonogashira reactions between iodobenzene, phenylacetylene using 1% of PdPEG@SBA-15 (ICP content:0.13 wt%) and 1% of CuPEG@SBA-15 (ICP content:0.06 wt%).

| Catalytic runs | 1 <sup>st</sup> | 2 <sup>nd</sup> | 3 <sup>rd</sup> | 4 <sup>th</sup> |
|----------------|-----------------|-----------------|-----------------|-----------------|
| Yield (%)      | 95              | 92              | 85              | 70              |
